# Supplementary material
Source: MDPI journal article supplement (https://www.mdpi.com/2073-4344/13/5/837)
Supplement: s1 [file s1]

## Supplementary information

# Density Functional Theory Study of the Hydrogenation of Carbon Monoxide over the Co (001) Surface: Implications for the Fischer-Tropsch Process

Mostafa Torkashvand<sup>1</sup>, Saeedeh Sarabadani Tafreshi<sup>1\*</sup> and Nora H. de Leeuw<sup>2,3</sup>

<sup>1</sup> Department of Chemistry, Amirkabir University of Technology, No. 350, Hafez Avenue, Valiasr Square, 1591634311 Tehran, Iran

<sup>2</sup> School of Chemistry, University of Leeds, LT2 9JT Leeds, UK

<sup>3</sup> Department of Earth Sciences, Utrecht University, 3584 CB Utrecht, The Netherlands

\* Correspondence: s.s.tafreshi@aut.ac.ir; n.h.deleeuw@leeds.ac.uk

Table S1: The structural details of the preferred adsorption geometries for all intermediates on the Co (001) surface.

| Species         | Site   | bond length (Å) |
|-----------------|--------|-----------------|
| CO              | Hollow | Co–C, 2.03      |
|                 |        | Co–O, 2.865     |
| COH             | Hollow | Co–C, 1.960     |
|                 |        | Co–O, 2.863     |
|                 |        | Co–H, 2.822     |
| HCO             | Hollow | Co–C, 1.917     |
|                 |        | Co–H, 2.619     |
|                 |        | Co–O, 1.928     |
| Cis-HCOH        | Hollow | Co–H, 2.747     |
|                 |        | Co–C, 1.970     |
|                 |        | Co–O, 2.365     |
|                 |        | Co–H, 3.144     |
| Trans-HCOH      | Bridge | Co–H, 2.685     |
|                 |        | Co–C, 1.930     |
|                 |        | Co–O, 2.854     |
|                 |        | Co–H, 2.597     |
| CH              | Hollow | Co–C, 1.942     |
|                 |        | Co–H, 2.627     |
| CH <sub>2</sub> | Hollow | Co–C, 2.091     |
|                 |        | Co–H, 1.841     |
|                 |        | Co–H, 2.554     |
| CH <sub>3</sub> | Hollow | Co–C, 1.967     |
|                 |        | Co–H, 1.923     |

|                               |        |  |             |
|-------------------------------|--------|--|-------------|
|                               |        |  | Co-H, 1.929 |
|                               |        |  | Co-H, 2.266 |
| CH <sub>4</sub>               | Hollow |  | Co-C, 3.645 |
|                               |        |  | Co-H, 2.841 |
|                               |        |  | Co-H, 2.928 |
|                               |        |  | Co-H, 4.046 |
|                               |        |  | Co-H, 4.041 |
| H <sub>2</sub> O              | Top    |  | Co-O, 2.141 |
|                               |        |  | Co-H, 2.218 |
|                               |        |  | Co-H, 2.631 |
| CH <sub>2</sub> OH            | Hollow |  | Co-C, 1.941 |
|                               |        |  | Co-H, 1.802 |
|                               |        |  | Co-H, 2.502 |
|                               |        |  | Co-O, 2.110 |
|                               |        |  | Co-H, 2.510 |
| CH <sub>3</sub> OH            | Top    |  | Co-C, 3.101 |
|                               |        |  | Co-H, 2.933 |
|                               |        |  | Co-H, 3.127 |
|                               |        |  | Co-H, 4.061 |
|                               |        |  | Co-O, 2.117 |
|                               |        |  | Co-H, 2.488 |
| C <sub>2</sub> H <sub>2</sub> | Hollow |  | Co-C, 1.843 |
|                               |        |  | Co-H, 2.487 |
|                               |        |  | Co-C, 1.843 |
|                               |        |  | Co-H, 2.487 |

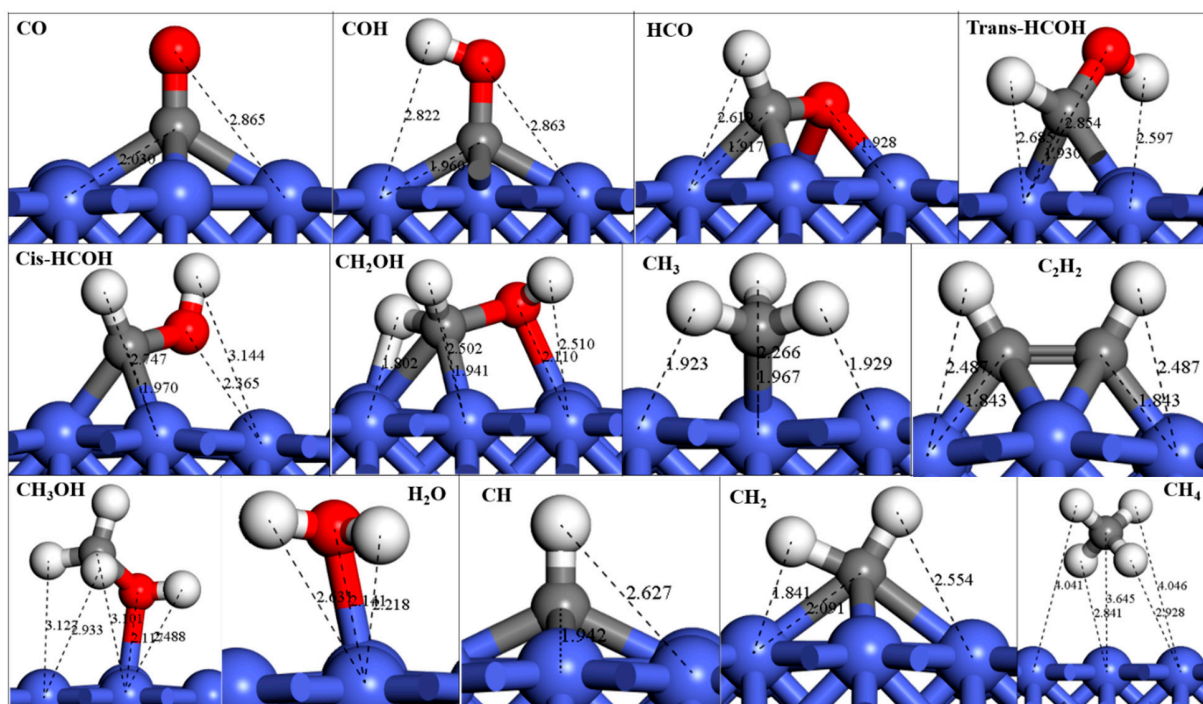

Figure S1: Side views of the lowest-energy adsorption configurations of each intermediate on the Co (001) surface. The bond lengths are shown in Å; the gray, white, red, and blue balls represent carbon, hydrogen, oxygen, and cobalt atoms, respectively.
